# Supplementary material
Source: publisher figshare collection journal article supplement (https://springernature.figshare.com/ndownloader/files/12751352)
Supplement: Supplementary file 1 [file 12751352]

## Motivations for Visiting Galápagos

### Motivations for Visiting Galápagos

**Please describe your interest in visiting Galápagos. These questions are part of a larger study conducted by Professor Sehoya Cotner at the University of Minnesota (Minnesota, USA). Note that we are not asking any personal information that will allow us to identify individual survey respondents. Also, you may choose to omit any of the survey items. Thank you in advance for your time.**

1. Thinking back to your pre-trip planning, what was your primary motivation to visit Galápagos?

2. How interested were you in this trip to Galápagos?

- ☐ I was not at all interested
- ☐ I was slightly interested
- ☐ I was somewhat interested
- ☐ I was very interested
- ☐ I was extremely interested

Feel free to explain your choice

3. Rate the personal appeal of the following possible reasons for visiting Galápagos.

|                                       | Not at all appealing  | Very slightly appealing | Somewhat appealing    | Very appealing        | Extremely appealing (one of my main motivations) |
|---------------------------------------|-----------------------|-------------------------|-----------------------|-----------------------|--------------------------------------------------|
| Unusual animals                       | <input type="radio"/> | <input type="radio"/>   | <input type="radio"/> | <input type="radio"/> | <input type="radio"/>                            |
| Unusual plants                        | <input type="radio"/> | <input type="radio"/>   | <input type="radio"/> | <input type="radio"/> | <input type="radio"/>                            |
| Photography                           | <input type="radio"/> | <input type="radio"/>   | <input type="radio"/> | <input type="radio"/> | <input type="radio"/>                            |
| Living on a boat                      | <input type="radio"/> | <input type="radio"/>   | <input type="radio"/> | <input type="radio"/> | <input type="radio"/>                            |
| Snorkeling                            | <input type="radio"/> | <input type="radio"/>   | <input type="radio"/> | <input type="radio"/> | <input type="radio"/>                            |
| Learning about history of the islands | <input type="radio"/> | <input type="radio"/>   | <input type="radio"/> | <input type="radio"/> | <input type="radio"/>                            |
| Learning about island culture         | <input type="radio"/> | <input type="radio"/>   | <input type="radio"/> | <input type="radio"/> | <input type="radio"/>                            |

|                                                     | Not at all appealing  | Very slightly appealing | Somewhat appealing    | Very appealing        | Extremely appealing (one of my main motivations) |
|-----------------------------------------------------|-----------------------|-------------------------|-----------------------|-----------------------|--------------------------------------------------|
| Learning about Ecuadorian culture                   | <input type="radio"/> | <input type="radio"/>   | <input type="radio"/> | <input type="radio"/> | <input type="radio"/>                            |
| Learning about Charles Darwin                       | <input type="radio"/> | <input type="radio"/>   | <input type="radio"/> | <input type="radio"/> | <input type="radio"/>                            |
| Learning about evolution                            | <input type="radio"/> | <input type="radio"/>   | <input type="radio"/> | <input type="radio"/> | <input type="radio"/>                            |
| Learning about the history of evolutionary thought  | <input type="radio"/> | <input type="radio"/>   | <input type="radio"/> | <input type="radio"/> | <input type="radio"/>                            |
| Learning about biology                              | <input type="radio"/> | <input type="radio"/>   | <input type="radio"/> | <input type="radio"/> | <input type="radio"/>                            |
| Learning about island conservation                  | <input type="radio"/> | <input type="radio"/>   | <input type="radio"/> | <input type="radio"/> | <input type="radio"/>                            |
| Learning about island biodiversity                  | <input type="radio"/> | <input type="radio"/>   | <input type="radio"/> | <input type="radio"/> | <input type="radio"/>                            |
| Learning about threats to the islands' biodiversity | <input type="radio"/> | <input type="radio"/>   | <input type="radio"/> | <input type="radio"/> | <input type="radio"/>                            |
| Enjoying the beaches                                | <input type="radio"/> | <input type="radio"/>   | <input type="radio"/> | <input type="radio"/> | <input type="radio"/>                            |
| Speaking Spanish                                    | <input type="radio"/> | <input type="radio"/>   | <input type="radio"/> | <input type="radio"/> | <input type="radio"/>                            |
| Learning about geology                              | <input type="radio"/> | <input type="radio"/>   | <input type="radio"/> | <input type="radio"/> | <input type="radio"/>                            |
| Seeing volcanoes                                    | <input type="radio"/> | <input type="radio"/>   | <input type="radio"/> | <input type="radio"/> | <input type="radio"/>                            |
| Visiting Charles Darwin Research Station            | <input type="radio"/> | <input type="radio"/>   | <input type="radio"/> | <input type="radio"/> | <input type="radio"/>                            |
| Crossing the equator                                | <input type="radio"/> | <input type="radio"/>   | <input type="radio"/> | <input type="radio"/> | <input type="radio"/>                            |
| SCUBA diving                                        | <input type="radio"/> | <input type="radio"/>   | <input type="radio"/> | <input type="radio"/> | <input type="radio"/>                            |
| Ecotourism                                          | <input type="radio"/> | <input type="radio"/>   | <input type="radio"/> | <input type="radio"/> | <input type="radio"/>                            |
| Hiking on the islands                               | <input type="radio"/> | <input type="radio"/>   | <input type="radio"/> | <input type="radio"/> | <input type="radio"/>                            |
| Hiking on a volcano                                 | <input type="radio"/> | <input type="radio"/>   | <input type="radio"/> | <input type="radio"/> | <input type="radio"/>                            |
| Visiting a remote location                          | <input type="radio"/> | <input type="radio"/>   | <input type="radio"/> | <input type="radio"/> | <input type="radio"/>                            |

Other (please comment on any of the above, or add other things that appeal to you about the islands)

4. What is your occupation?

5. What is your highest level of education?

6. Which of the following options describes your current age?

- ☐ 18-25
- ☐ 26-34
- ☐ 35-44
- ☐ 45-54
- ☐ 55-64
- ☐ 65-74
- ☐ 75-84
- ☐ 85 or above

7. What is your gender?

- ☐ Male
- ☐ Female
- ☐ Other
